# Supplementary material
Source: Research Square preprint supplement (doi:10.21203/rs.3.rs-9376046/v1)
Supplement: Supplementary file 1 [file 93bd1eb556dd4efb34245d74.pdf]

**The oldest Pacific carbonate fluorapatite and Fe-Mn crust: a new episode of Turonian–Coniacian phosphatization event**

I.S. Peretyazhko<sup>1,\*</sup>, E.A. Savina<sup>1</sup>, E.A. Gladkochub<sup>2</sup>

<sup>1</sup> Vinogradov Institute of Geochemistry, Russian Academy of Sciences, Siberian Branch, 1A Favorsky St., Irkutsk, 664033, Russia

<sup>2</sup> Institute of the Earth's Crust, Siberian Branch of the Russian Academy of Sciences, 128 Lermontov St., Irkutsk, 664033, Russia

**Contents of this file:** Figures S1 to S3, Tables S1 to S5

\*Corresponding author: I.S. Peretyazhko (pgmigor@mail.ru)

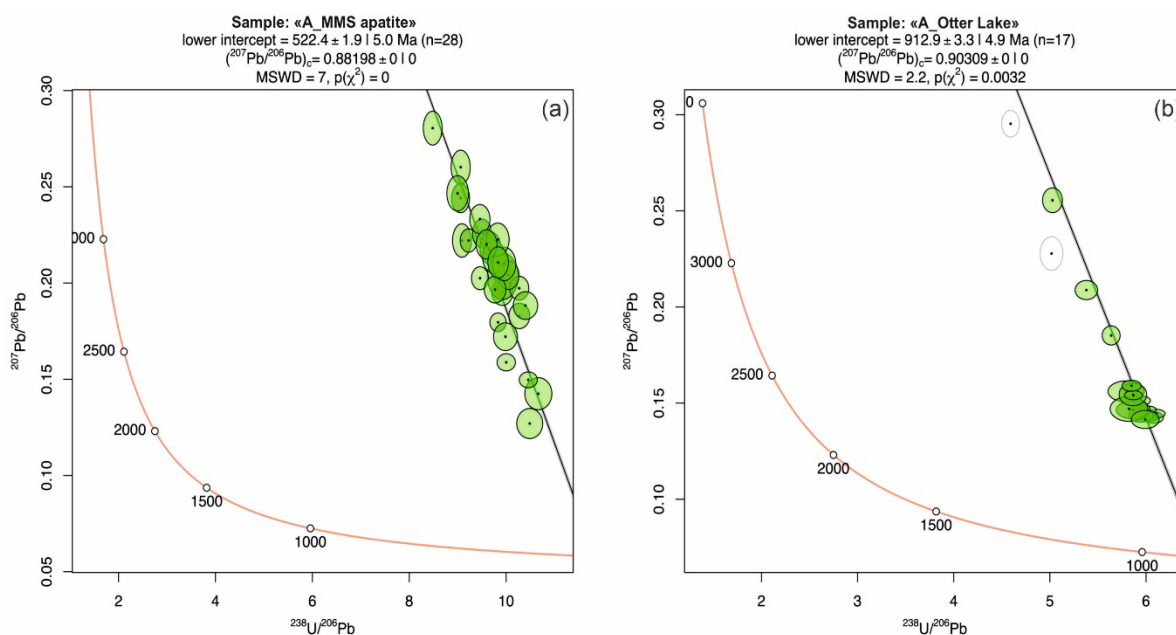

| Apatite sample | Anchored initial $^{207}\text{Pb}/^{206}\text{Pb}$ | The method determines initial $^{207}\text{Pb}/^{206}\text{Pb}$                  |
|----------------|----------------------------------------------------|----------------------------------------------------------------------------------|
| A_MMS          | 0.88198                                            | ID-TIMS total U-Pb isochron (Schoene and Bowring 2006)                           |
| A_Otter Lake   | 0.90309                                            | $^{207}\text{Pb}/^{206}\text{Pb}$ apatite stepwise leaching (Barfod et al. 2005) |

**Figure S1** U-Pb LA-ICP-MS dating of standard apatite samples: (a) A\_MMS; (b) A\_Otter Lake.

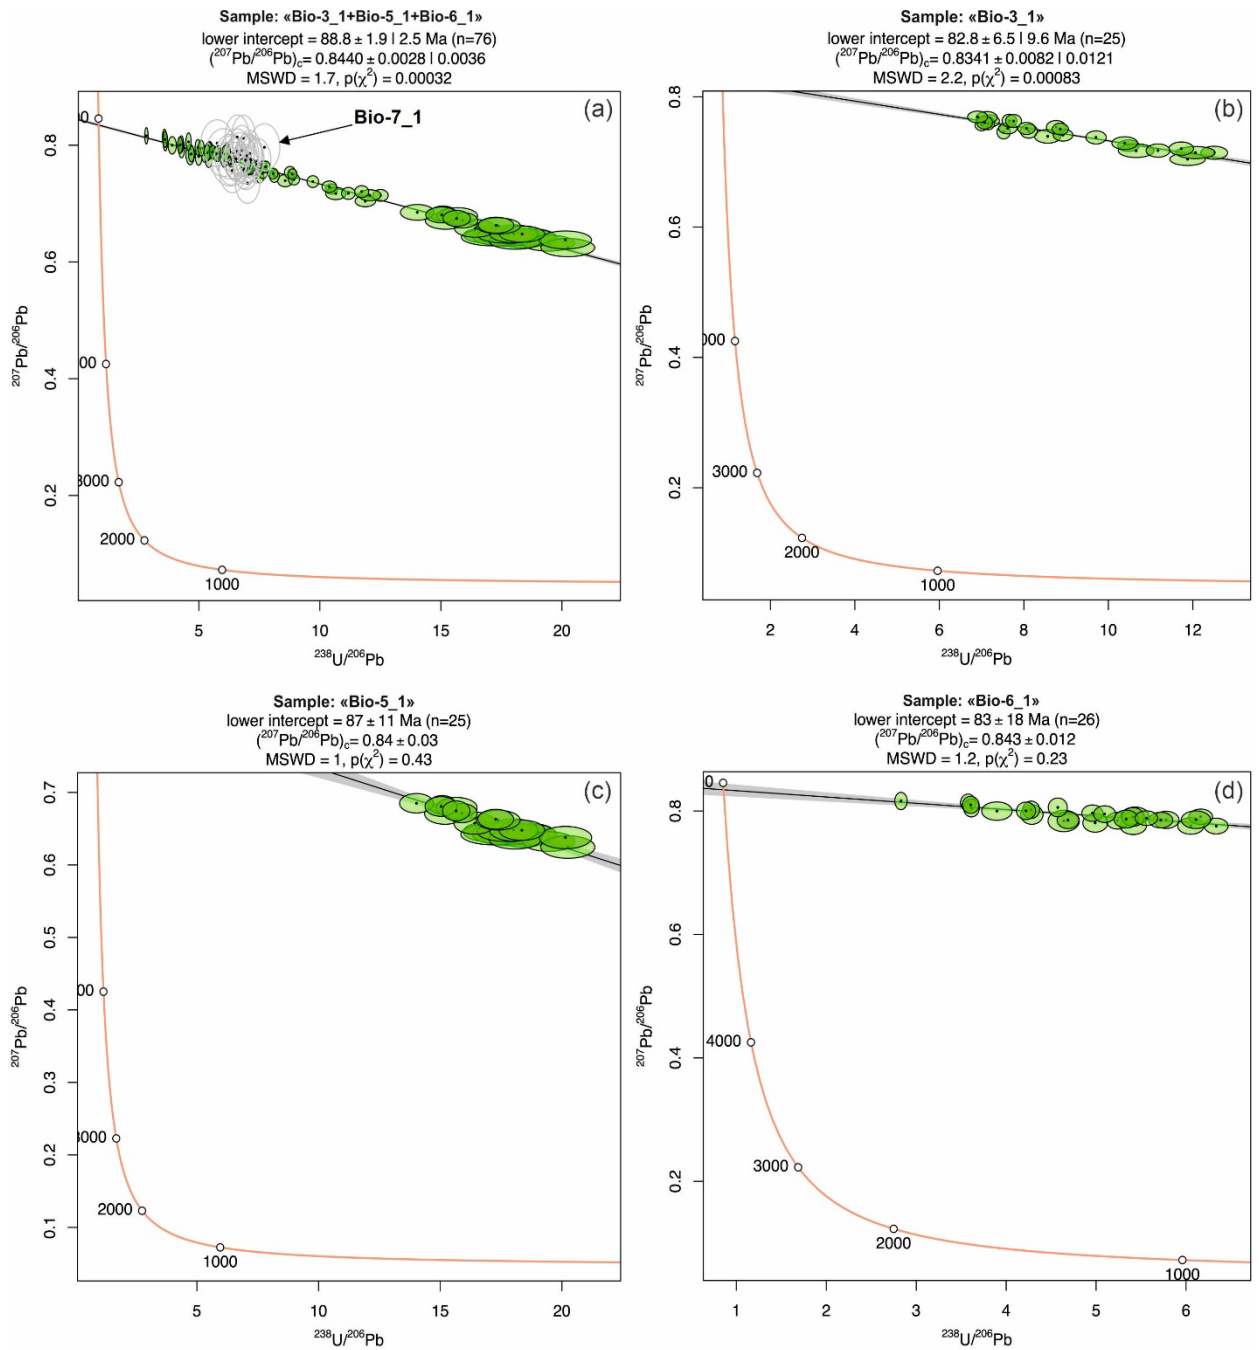

19  
 20  
 21  
 22  
 23

**Figure S2** U-Pb LA-ICP-MS CFA dating from the biogenic region geode in sample 08D97 (Fig. 1): **(a)** Bio-3 + Bio-5 + Bio-6); **(b)** Bio-3; **(c)** Bio-5; **(d)** Bio-6.

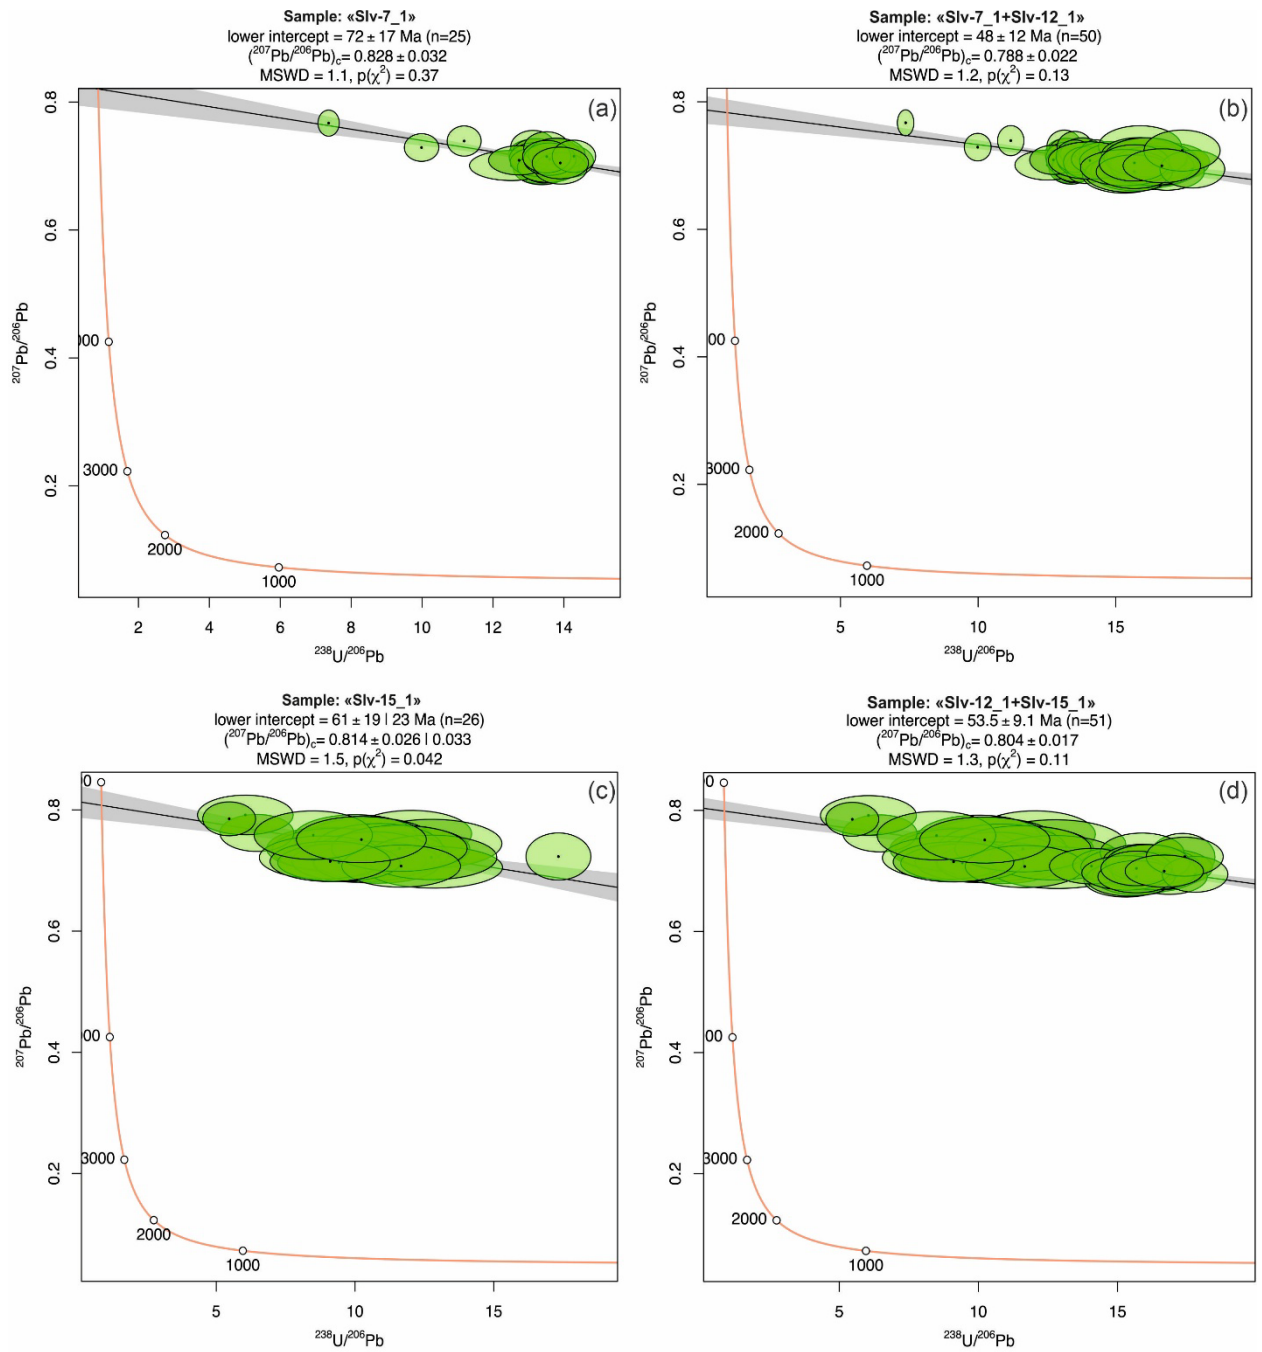

24  
 25  
 26  
 27  
 28  
 29  
 30

**Figure S3** U-Pb LA-ICP-MS CFA dating from the chemogenic region geode in sample 08D97 (Fig. 1): **(a)** Slv-7); **(b)** Slv-7 + Slv-12; **(c)** Slv-15; **(d)** Slv-12 + Slv-15

31

32

33

**Table S1** Instrument parameters for carbonate fluorapatite LA-ICP-MS trace element data.

34

| <b>Laser Ablation System</b>   |                                                                                                                               |
|--------------------------------|-------------------------------------------------------------------------------------------------------------------------------|
| Imaging                        | TESCAN MIRA IV LMS with an Oxford Instruments X-Max 80 mm <sup>2</sup> EDS detector, 1 nA, 20 keV                             |
| Make, Model & type             | Photon Machines, Inc., Redmond, USA, Photon Machines Analyte Exite                                                            |
| Ablation cell & volume         | ~10 x 10 cm HelEx II active double-volume sample cell with 9x1-inch and 4x0.25-inch glass standard holes, CETAC Teledyne, USA |
| Laser wavelength               | UV 193 nm                                                                                                                     |
| Pulse width                    | <4 ns                                                                                                                         |
| Fluence                        | ~4.75 J/cm <sup>2</sup>                                                                                                       |
| Repetition rate                | 10 Hz                                                                                                                         |
| Ablation duration              | 60 s                                                                                                                          |
| Ablation type                  | Static spot ablation                                                                                                          |
| Spot diameter (nominal/actual) | 110 μm / 110 μm                                                                                                               |
| Carrier gas                    | Helium with a purity of 6.0                                                                                                   |
| Cell carrier gas flow          | ~0.92 l/min                                                                                                                   |
| <b>ICP-MS Instrument</b>       |                                                                                                                               |
| Make, Model & type             | Agilent Technologies, Agilent 7900 Q-ICP-MS                                                                                   |
| Sample introduction            | Ablation aerosol                                                                                                              |
| RF forward power               | 1550 W                                                                                                                        |
| Reflect RF power               | <1W                                                                                                                           |
| Interface cones                | Nickel                                                                                                                        |
| Cooling gas                    | Ar: 16 l/min                                                                                                                  |
| Auxiliary gas                  | Ar: 0.98 l/min                                                                                                                |
| ThO/Th ratio (248/232)         | <0.5%                                                                                                                         |
| Detection system               | Electron multiplier                                                                                                           |

|                                             |                                                                                                                                                                                                                                                                                                                                                                                                                                                                                                                                                                                                                                                                                                                                                                                                                                                                                                                                                                                                                                                                                                                                                                                                                                                                                                                                                                                      |
|---------------------------------------------|--------------------------------------------------------------------------------------------------------------------------------------------------------------------------------------------------------------------------------------------------------------------------------------------------------------------------------------------------------------------------------------------------------------------------------------------------------------------------------------------------------------------------------------------------------------------------------------------------------------------------------------------------------------------------------------------------------------------------------------------------------------------------------------------------------------------------------------------------------------------------------------------------------------------------------------------------------------------------------------------------------------------------------------------------------------------------------------------------------------------------------------------------------------------------------------------------------------------------------------------------------------------------------------------------------------------------------------------------------------------------------------|
| Masses measured                             | 9, 23, 25, 27, 29, 31, 39, 43, 45, 49, 51, 52, 55, 57, 59, 60, 63, 66, 71, 85, 88, 89, 90, 93, 95, 118, 121, 133, 137, 139, 140, 141, 146, 147, 153, 157, 159, 163, 165, 166, 169, 172, 175, 178, 181, 184, 205, 208, 209, 232, 238                                                                                                                                                                                                                                                                                                                                                                                                                                                                                                                                                                                                                                                                                                                                                                                                                                                                                                                                                                                                                                                                                                                                                  |
| Dwell time                                  | <sup>9</sup> Be (25 ms), <sup>23</sup> Na (5 ms), <sup>25</sup> Mg (5 ms), <sup>27</sup> Al (5 ms), <sup>29</sup> Si (5 ms), <sup>31</sup> P (5 ms), <sup>39</sup> K (5 ms), <sup>43</sup> Ca (5 ms), <sup>45</sup> Sc (15 ms), <sup>47</sup> Ti (5 ms), <sup>51</sup> V (15 ms), <sup>52</sup> Cr (20 ms), <sup>55</sup> Mn (5 ms), <sup>57</sup> Fe (5 ms), <sup>59</sup> Co (15 ms), <sup>60</sup> Ni (15 ms), <sup>63</sup> Cu (15 ms), <sup>66</sup> Zn (15 ms), <sup>71</sup> Ga (15 ms), <sup>85</sup> Rb (15 ms), <sup>88</sup> Sr (15 ms), <sup>89</sup> Y (15 ms), <sup>90</sup> Zr (15 ms), <sup>93</sup> Nb (25 ms), <sup>95</sup> Mo (15 ms), <sup>118</sup> Sn (5 ms), <sup>121</sup> Sb (15 ms), <sup>133</sup> Cs (15 ms), <sup>137</sup> Ba (15 ms), <sup>139</sup> La (30 ms), <sup>140</sup> Ce (30 ms), <sup>141</sup> Pr (30 ms), <sup>146</sup> Nd (30 ms), <sup>147</sup> Sm (30 ms), <sup>153</sup> Eu (30 ms), <sup>157</sup> Gd (30 ms), <sup>159</sup> Tb (30 ms), <sup>163</sup> Dy (30 ms), <sup>165</sup> Ho (30 ms), <sup>166</sup> Er (30 ms), <sup>169</sup> Tm (30 ms), <sup>172</sup> Yb (30 ms), <sup>175</sup> Lu (30 ms), <sup>178</sup> Hf (30 ms), <sup>181</sup> Ta (30 ms), <sup>184</sup> W (25 ms), <sup>205</sup> Tl (20 ms), <sup>208</sup> Pb (25 ms), <sup>209</sup> Bi (30 ms), <sup>232</sup> Th (30 ms), <sup>238</sup> U (30 ms) |
| Total integration time per output datapoint | 1.086 s                                                                                                                                                                                                                                                                                                                                                                                                                                                                                                                                                                                                                                                                                                                                                                                                                                                                                                                                                                                                                                                                                                                                                                                                                                                                                                                                                                              |
| <b>Data Processing</b>                      |                                                                                                                                                                                                                                                                                                                                                                                                                                                                                                                                                                                                                                                                                                                                                                                                                                                                                                                                                                                                                                                                                                                                                                                                                                                                                                                                                                                      |
| Gas blank                                   | 40 second on-peak zero subtracted                                                                                                                                                                                                                                                                                                                                                                                                                                                                                                                                                                                                                                                                                                                                                                                                                                                                                                                                                                                                                                                                                                                                                                                                                                                                                                                                                    |
| Calibration strategy                        | NIST SRM 610 used as primary reference material, NIST SRM 612 used as secondaries/validation                                                                                                                                                                                                                                                                                                                                                                                                                                                                                                                                                                                                                                                                                                                                                                                                                                                                                                                                                                                                                                                                                                                                                                                                                                                                                         |
| Reference Material info                     | NIST SRM 610 (Pearce et al., 1997)<br>NIST SRM 612 (Pearce et al., 1997)                                                                                                                                                                                                                                                                                                                                                                                                                                                                                                                                                                                                                                                                                                                                                                                                                                                                                                                                                                                                                                                                                                                                                                                                                                                                                                             |
| Mass discrimination                         | Standard sample bracketing                                                                                                                                                                                                                                                                                                                                                                                                                                                                                                                                                                                                                                                                                                                                                                                                                                                                                                                                                                                                                                                                                                                                                                                                                                                                                                                                                           |
| Reduction software                          | Iolite v.4.10.8 software (Paton et al., 2011)                                                                                                                                                                                                                                                                                                                                                                                                                                                                                                                                                                                                                                                                                                                                                                                                                                                                                                                                                                                                                                                                                                                                                                                                                                                                                                                                        |

35  
36  
37  
38

**Table S2** Instrument parameters for carbonate fluorapatite U-Pb LA-ICP-MS dating.

|                              |                                                                                                                               |
|------------------------------|-------------------------------------------------------------------------------------------------------------------------------|
| <b>Laser Ablation System</b> |                                                                                                                               |
| Imaging                      | Elemental, TESCAN MIRA IV LMS, with an Oxford Instruments X-Max 80 mm <sup>2</sup> EDS detector, 1 nA, 20 keV                 |
| Make, Model & type           | Photon Machines, Inc., Redmond, USA, Photon Machines Analyte Exite                                                            |
| Ablation cell & volume       | ~10 x 10 cm HelEx II active double-volume sample cell with 9x1-inch and 4x0.25-inch glass standard holes, CETAC Teledyne, USA |
| Laser wavelength             | UV 193 nm                                                                                                                     |
| Pulse width                  | <4 ns                                                                                                                         |
| Fluence                      | ~4.31 J/cm <sup>2</sup>                                                                                                       |
| Repetition rate              | 10 Hz                                                                                                                         |
| Ablation duration            | 40 s                                                                                                                          |

|                                                    |                                                                                                                                                                                                                                                                           |
|----------------------------------------------------|---------------------------------------------------------------------------------------------------------------------------------------------------------------------------------------------------------------------------------------------------------------------------|
| Ablation type                                      | Static spot ablation                                                                                                                                                                                                                                                      |
| Spot diameter (nominal/actual)                     | 50 $\mu\text{m}$ /50 $\mu\text{m}$                                                                                                                                                                                                                                        |
| Carrier gas                                        | Helium with a purity of 6.0                                                                                                                                                                                                                                               |
| Cell carrier gas flow                              | ~0.92 l/min                                                                                                                                                                                                                                                               |
| <b>ICP-MS Instrument</b>                           |                                                                                                                                                                                                                                                                           |
| Make, Model & type                                 | Agilent Technologies, Agilent 7900 Q-ICP-MS                                                                                                                                                                                                                               |
| Sample introduction                                | Ablation aerosol                                                                                                                                                                                                                                                          |
| RF forward power                                   | 1550 W                                                                                                                                                                                                                                                                    |
| Reflect RF power                                   | <1W                                                                                                                                                                                                                                                                       |
| Interface cones                                    | Nickel                                                                                                                                                                                                                                                                    |
| Cooling gas                                        | Ar: 16 l/min                                                                                                                                                                                                                                                              |
| Auxiliary gas                                      | Ar: 0.98 l/min                                                                                                                                                                                                                                                            |
| ThO/Th ratio (248/232)                             | <0.5%                                                                                                                                                                                                                                                                     |
| Detection system                                   | Electron multiplier                                                                                                                                                                                                                                                       |
| Masses measured                                    | 206, 207, 238                                                                                                                                                                                                                                                             |
| Dwell time                                         | 30 ms for 206, 40 ms for 207 and 25 ms for 238                                                                                                                                                                                                                            |
| Total integration time per output datapoint        | ~0.1 s                                                                                                                                                                                                                                                                    |
| <b>Data Processing</b>                             |                                                                                                                                                                                                                                                                           |
| Gas blank                                          | 40 second on-peak zero subtracted                                                                                                                                                                                                                                         |
| Calibration strategy                               | NIST SRM 610 used as primary reference material, MMS, and Otter Lake apatites used as secondaries/validation                                                                                                                                                              |
| Reference Material info                            | NIST SRM 610 (Pearce et al., 1997)<br>MMS (Schoene et al., 2006)<br>Otter Lake (Barfod et al., 2005)                                                                                                                                                                      |
| Data processing package used / Correction for LIEF | Initial signal integration using Agilent MassHunter TRA software. Spreadsheet data processing using iolite v4.10.8. No LIEF correction (mean of uncorrected ratios used). IsoplotR software (Vermeesch, 2018) for isochrons, intercept ages, and initial Pb compositions. |
| Mass discrimination / Mass fractionation           | NIST SRM 610 to account for mass discrimination effects and correction for U/Pb mass fractionation was performed using the MMS apatite standard                                                                                                                           |

|                                                   |                                                                                                                                                                                                                 |
|---------------------------------------------------|-----------------------------------------------------------------------------------------------------------------------------------------------------------------------------------------------------------------|
| Common-Pb correction, composition and uncertainty | No common-Pb correction applied to the data                                                                                                                                                                     |
| Uncertainty level & propagation                   | Ages are quoted at 2s absolute, propagation is by quadratic addition. Excess variance of reference material propagated into sample data. Systematic uncertainties include age uncertainty of reference material |
| Quality control / Validation                      | MMS apatite – Lower intercept age = $522.4 \pm 5$ (2s, MSWD = 7, n=28)<br>Otter Lake apatite – Lower intercept age = $912.9 \pm 4.9$ (2s, MSWD = 2.2, n=17)                                                     |

39  
40  
41  
42

**Table S3** Carbonate fluorapatite in biogenic region and Calcite LA-ICP-MS data (ppm).

|    | Bio-1  | Bio-3  | Bio-4  | Bio-5  | Bio-6  | Average | Cal-18 | Cal-19 | Cal-20 | Average |
|----|--------|--------|--------|--------|--------|---------|--------|--------|--------|---------|
| Si | 1447   | 2557   | 2608   | <d/l   | 2495   | 2276    | 799    | 896    | 1294   | 996     |
| Ti | 105.7  | 64.7   | 45.6   | 27.7   | 58.2   | 60.4    | 3.57   | 6.41   | 2.35   | 4.11    |
| Mg | 2909   | 2730   | 3199   | 3406   | 2883   | 3026    | 4525   | 3869   | 3914   | 4103    |
| Na | 11261  | 8931   | 10330  | 10603  | 10717  | 10368   | 40.58  | 65.63  | 48.73  | 51.65   |
| K  | 391    | 493    | 347    | 285    | 487    | 401     | 13.42  | 54.63  | 13.92  | 27.32   |
| Mn | 82.1   | 55.8   | 94.7   | 87.5   | 82.6   | 80.5    | 42.51  | 51.24  | 40.63  | 44.79   |
| Fe | 630.9  | 782.3  | 517.0  | 422.4  | 888.3  | 648.2   | 170.29 | 291.21 | 146.78 | 202.76  |
| P  | 124674 | 115264 | 126973 | 119805 | 121383 | 121620  | 321.85 | 277.72 | 274.29 | 291.29  |
| Al | 544    | 758    | 432    | 510    | 704    | 590     | 151.88 | 216.75 | 249.45 | 206.03  |
| Be | 0.91   | 0.29   | 0.34   | 0.44   | 1.16   | 0.63    | <d/l   | <d/l   | <d/l   | <d/l    |
| Sc | 3.86   | 0.91   | 0.40   | 0.28   | 0.95   | 1.28    | <d/l   | <d/l   | <d/l   | <d/l    |
| V  | 69.89  | 55.51  | 33.41  | 23.12  | 67.47  | 49.88   | 0.26   | 0.60   | 0.22   | 0.36    |
| Cr | 15.73  | 5.28   | 21.98  | <d/l   | 21.61  | 16.15   | 3.39   | <d/l   | 16.20  | 9.79    |
| Co | 0.98   | 0.72   | 0.99   | 0.88   | 0.53   | 0.82    | 0.74   | 0.59   | 0.65   | 0.66    |
| Ni | 9.12   | 9.37   | 9.99   | 8.93   | 6.62   | 8.81    | 2.78   | 3.51   | 3.17   | 3.15    |
| Cu | 10.39  | 7.77   | 6.54   | 6.05   | 6.47   | 7.44    | 0.27   | 0.63   | 0.44   | 0.45    |
| Zn | 113.75 | 99.48  | 96.17  | 86.71  | 90.23  | 97.27   | 6.00   | 8.16   | 8.70   | 7.62    |
| Ga | 0.54   | 0.51   | 0.34   | 0.26   | 0.42   | 0.41    | <d/l   | 0.03   | <d/l   | 0.03    |
| Rb | 1.09   | 1.73   | 0.65   | 0.59   | 1.44   | 1.10    | <d/l   | 0.26   | <d/l   | 0.26    |
| Sr | 2589   | 2297   | 2597   | 2635   | 2593   | 2542    | 92.74  | 99.55  | 118.29 | 103.53  |

|       |        |       |       |       |       |       |      |       |      |       |
|-------|--------|-------|-------|-------|-------|-------|------|-------|------|-------|
| Zr    | 27.22  | 27.89 | 9.76  | 11.40 | 21.46 | 19.55 | 0.47 | 0.64  | 0.47 | 0.52  |
| Nb    | 0.32   | 0.37  | 0.24  | 0.18  | 0.24  | 0.27  | 0.03 | 0.18  | 0.35 | 0.19  |
| Mo    | 0.63   | 0.55  | 0.55  | 0.49  | 0.58  | 0.56  | 0.06 | <d/l  | 0.10 | 0.08  |
| Sn    | <d/l   | 0.47  | <d/l  | 0.48  | <d/l  | 0.47  | <d/l | <d/l  | <d/l |       |
| Sb    | 0.78   | 0.85  | 0.56  | 0.51  | 1.36  | 0.81  | 0.07 | <d/l  | <d/l | 0.07  |
| Cs    | 0.17   | 0.18  | 0.14  | 0.16  | 0.12  | 0.15  | 0.12 | 0.28  | 0.18 | 0.19  |
| Ba    | 26.37  | 23.24 | 27.70 | 27.53 | 28.27 | 26.62 | 1.34 | 46.76 | 1.42 | 16.51 |
| Hf    | 0.32   | 0.28  | 0.12  | 0.11  | 0.24  | 0.22  | <d/l | 0.01  | 0.01 | 0.01  |
| Ta    | 0.01   | 0.01  | 0.02  | 0.00  | 0.00  | 0.01  | 0.00 | 0.01  | 0.04 | 0.02  |
| W     | 0.08   | 0.11  | 0.11  | 0.13  | 0.04  | 0.09  | 0.02 | 0.16  | 0.44 | 0.21  |
| Tl    | 0.04   | 0.05  | 0.05  | 0.07  | 0.04  | 0.05  | 0.36 | 0.30  | 0.45 | 0.37  |
| Pb    | 13.36  | 11.17 | 8.50  | 7.01  | 17.88 | 11.59 | 0.67 | 0.84  | 0.60 | 0.70  |
| Bi    | 0.16   | 0.14  | 0.11  | 0.06  | 0.14  | 0.12  | <d/l | <d/l  | <d/l |       |
| Th    | 0.11   | 0.11  | 0.09  | 0.05  | 0.09  | 0.09  | 0.00 | 0.01  | <d/l | 0.00  |
| U     | 24.25  | 37.65 | 50.73 | 54.80 | 23.26 | 38.14 | 0.11 | 0.08  | 0.09 | 0.09  |
| La    | 39.03  | 11.45 | 3.94  | 2.79  | 10.12 | 13.47 | 0.07 | 0.17  | 0.07 | 0.10  |
| Ce    | 24.48  | 3.18  | 2.52  | 0.97  | 3.44  | 6.92  | 0.21 | 0.32  | 0.22 | 0.25  |
| Pr    | 4.73   | 0.77  | 0.44  | 0.19  | 0.67  | 1.36  | 0.00 | 0.03  | 0.01 | 0.01  |
| Nd    | 19.43  | 2.89  | 1.83  | 0.80  | 2.63  | 5.52  | 0.03 | 0.13  | 0.02 | 0.06  |
| Sm    | 3.58   | 0.47  | 0.23  | 0.15  | 0.40  | 0.97  | 0.01 | 0.02  | <d/l | 0.02  |
| Eu    | 1.00   | 0.12  | 0.09  | 0.05  | 0.10  | 0.27  | 0.00 | 0.01  | 0.00 | 0.01  |
| Gd    | 5.44   | 0.75  | 0.38  | 0.21  | 0.66  | 1.49  | <d/l | 0.03  | <d/l | 0.03  |
| Tb    | 0.78   | 0.10  | 0.08  | 0.03  | 0.10  | 0.22  | <d/l | 0.00  | <d/l | 0.00  |
| Dy    | 5.73   | 0.84  | 0.51  | 0.23  | 0.81  | 1.62  | 0.01 | 0.03  | <d/l | 0.02  |
| Y     | 77.67  | 17.46 | 6.94  | 4.16  | 18.19 | 24.89 | 0.08 | 0.30  | 0.11 | 0.16  |
| Ho    | 1.47   | 0.26  | 0.12  | 0.06  | 0.23  | 0.43  | <d/l | 0.01  | 0.00 | 0.00  |
| Er    | 4.97   | 0.85  | 0.43  | 0.17  | 0.86  | 1.46  | 0.01 | 0.01  | 0.00 | 0.01  |
| Tm    | 0.75   | 0.14  | 0.06  | 0.03  | 0.13  | 0.22  | <d/l | <d/l  | 0.00 | 0.00  |
| Yb    | 4.87   | 0.99  | 0.39  | 0.19  | 0.86  | 1.46  | <d/l | 0.02  | 0.01 | 0.01  |
| Lu    | 0.84   | 0.18  | 0.06  | 0.04  | 0.18  | 0.26  | <d/l | 0.00  | 0.00 | 0.00  |
| Ce*   | 0.39   | 0.21  | 0.41  | 0.26  | 0.25  | 0.30  | 2.22 | 1.00  | 1.98 | 1.42  |
| REE+Y | 194.77 | 40.47 | 18.03 | 10.06 | 39.38 | 60.54 | 0.42 | 1.08  | 0.45 | 0.69  |

43  
44  
45  
46

**Table S4** Carbonate fluorapatite in chemogenic region LA-ICP-MS data (ppm).

|    | Slv-2  | Slv-7  | Slv-8  | Slv-9  | Slv-10 | Slv-11 | Slv-12 | Slv-13 | Slv-14 | Slv-15 | Average |
|----|--------|--------|--------|--------|--------|--------|--------|--------|--------|--------|---------|
| Si | 7603   | 10113  | 8832   | 10370  | 8999   | 10490  | 10628  | 9950   | 4396   | 4145   | 8553    |
| Ti | 121.6  | 155.1  | 126.5  | 164.9  | 113.5  | 91.3   | 76.0   | 89.2   | 41.6   | 50.9   | 103.1   |
| Mg | 1374   | 1394   | 1366   | 1552   | 1415   | 1502   | 1460   | 1452   | 788    | 827    | 1313    |
| Na | 7112   | 6774   | 6902   | 7059   | 7414   | 6828   | 7320   | 7459   | 7719   | 7744   | 7233    |
| K  | 1012   | 1358   | 1150   | 1591   | 1416   | 1617   | 1606   | 1658   | 549    | 710    | 1267    |
| Mn | 22.2   | 22.4   | 19.7   | 34.3   | 33.5   | 31.9   | 27.7   | 34.2   | 45.8   | 46.0   | 31.8    |
| Fe | 17010  | 1939   | 1762   | 2565   | 2002   | 2249   | 2431   | 24522  | 879    | 905    | 1889    |
| P  | 121744 | 115758 | 120094 | 116608 | 120610 | 118526 | 122474 | 126523 | 122850 | 122463 | 120765  |
| Al | 2863   | 3680   | 3175   | 4447   | 3839   | 4503   | 4491   | 4530   | 1498   | 1575   | 3460    |
| Be | 0.54   | 0.48   | 0.52   | 0.54   | 0.35   | 0.58   | <d/l   | 0.36   | 0.33   | 0.22   | 0.43    |
| Sc | 1.01   | 2.57   | 4.68   | 2.21   | 2.11   | 1.90   | 2.03   | 3.94   | 17.04  | 15.09  | 5.26    |
| V  | 17.31  | 18.77  | 17.47  | 20.94  | 19.00  | 17.98  | 18.10  | 18.88  | 12.78  | 12.75  | 17.40   |
| Cr | 5.14   | 4.05   | 16.03  | <d/l   | 9.26   | 4.10   | 21.66  | <d/l   | <d/l   | <d/l   | 10.04   |
| Co | 0.80   | 0.68   | 0.57   | 0.77   | 0.78   | 0.59   | 0.68   | 0.84   | 0.66   | 0.72   | 0.71    |
| Ni | 3.24   | 3.00   | 2.42   | 3.76   | 3.35   | 3.34   | 3.28   | 3.77   | 3.27   | 3.57   | 3.30    |
| Cu | 3.63   | 4.95   | 4.85   | 5.75   | 5.02   | 4.92   | 5.14   | 5.74   | 2.81   | 3.03   | 4.58    |
| Zn | 37.93  | 39.85  | 38.99  | 43.57  | 40.92  | 39.56  | 40.00  | 40.99  | 27.06  | 26.20  | 37.51   |
| Ga | 0.93   | 1.23   | 1.04   | 1.18   | 1.10   | 1.18   | 1.20   | 1.19   | 0.55   | 0.71   | 1.03    |
| Rb | 5.10   | 6.57   | 5.98   | 8.02   | 6.90   | 8.34   | 8.27   | 8.38   | 2.56   | 2.64   | 6.28    |
| Sr | 1338   | 1320   | 1364   | 1347   | 1333   | 1226   | 1172   | 1217   | 1106   | 1068   | 1249    |
| Zr | 70.35  | 115.18 | 117.25 | 83.92  | 71.08  | 56.10  | 50.47  | 54.04  | 57.18  | 48.33  | 72.39   |
| Nb | 0.36   | 0.42   | 0.37   | 0.59   | 0.42   | 0.33   | 0.26   | 0.30   | 0.13   | 0.17   | 0.33    |
| Mo | 0.64   | 0.69   | 0.76   | 0.48   | 0.60   | 0.43   | 0.45   | 0.50   | 0.63   | 0.59   | 0.58    |
| Sn | <d/l   | 0.47   | 0.59   | 0.57   | 0.48   | 0.57   | 0.52   | 0.40   | 0.55   | 0.66   | 0.53    |
| Sb | 2.50   | 2.47   | 2.53   | 2.55   | 2.43   | 1.98   | 2.00   | 2.04   | 2.04   | 2.03   | 2.26    |
| Cs | 0.55   | 0.70   | 0.69   | 0.88   | 0.69   | 0.94   | 0.87   | 1.05   | 0.34   | 0.33   | 0.70    |
| Ba | 11.44  | 14.71  | 12.81  | 12.78  | 12.25  | 12.23  | 12.23  | 13.92  | 27.62  | 469    | 59.89   |

|       |       |       |        |       |       |       |       |       |        |        |       |
|-------|-------|-------|--------|-------|-------|-------|-------|-------|--------|--------|-------|
| Hf    | 0.69  | 1.06  | 1.15   | 0.94  | 0.85  | 0.72  | 0.68  | 0.74  | 0.53   | 0.43   | 0.78  |
| Ta    | 0.02  | 0.02  | 0.02   | 0.03  | 0.02  | 0.01  | 0.01  | 0.01  | 0.01   | 0.01   | 0.02  |
| W     | 0.04  | 0.05  | 0.03   | 0.05  | 0.05  | 0.02  | 0.03  | 0.03  | 0.02   | 0.03   | 0.03  |
| Tl    | 0.06  | 0.08  | 0.06   | 0.09  | 0.09  | 0.10  | 0.10  | 0.11  | 0.05   | 0.06   | 0.08  |
| Pb    | 2.73  | 2.39  | 2.13   | 1.74  | 1.59  | 1.27  | 1.13  | 1.24  | 1.15   | 1.13   | 1.65  |
| Bi    | 0.04  | 0.04  | 0.03   | 0.04  | <d/l  | 0.03  | 0.03  | <d/l  | <d/l   | 0.03   | 0.03  |
| Th    | 0.34  | 0.54  | 0.42   | 0.46  | 0.33  | 0.28  | 0.19  | 0.22  | 0.09   | 0.07   | 0.29  |
| U     | 12.65 | 12.72 | 12.48  | 11.53 | 11.21 | 8.86  | 8.11  | 8.33  | 7.13   | 6.68   | 9.97  |
| La    | 8.26  | 26.83 | 57.25  | 28.70 | 26.53 | 18.08 | 15.40 | 24.28 | 40.79  | 38.57  | 28.47 |
| Ce    | 3.64  | 7.26  | 15.68  | 7.04  | 6.22  | 3.53  | 2.96  | 4.23  | 5.99   | 7.05   | 6.36  |
| Pr    | 0.78  | 1.76  | 4.02   | 1.83  | 1.82  | 1.06  | 0.93  | 1.76  | 3.68   | 4.46   | 2.21  |
| Nd    | 3.08  | 6.67  | 16.14  | 7.08  | 7.21  | 4.06  | 3.61  | 6.74  | 14.64  | 18.33  | 8.76  |
| Sm    | 0.53  | 1.03  | 2.47   | 1.11  | 1.17  | 0.61  | 0.52  | 1.01  | 2.38   | 3.33   | 1.42  |
| Eu    | 0.14  | 0.32  | 0.70   | 0.30  | 0.32  | 0.18  | 0.14  | 0.32  | 0.67   | 0.98   | 0.41  |
| Gd    | 0.74  | 1.76  | 4.30   | 1.77  | 1.90  | 1.06  | 0.89  | 1.75  | 4.42   | 5.46   | 2.41  |
| Tb    | 0.10  | 0.26  | 0.61   | 0.23  | 0.25  | 0.14  | 0.12  | 0.25  | 0.64   | 0.77   | 0.34  |
| Dy    | 0.74  | 2.00  | 4.97   | 1.83  | 1.84  | 1.03  | 0.94  | 1.73  | 5.30   | 5.77   | 2.61  |
| Y     | 9.81  | 35.78 | 78.47  | 31.20 | 28.37 | 18.95 | 16.84 | 29.03 | 71.25  | 66.06  | 38.58 |
| Ho    | 0.19  | 0.60  | 1.45   | 0.52  | 0.49  | 0.30  | 0.26  | 0.52  | 1.51   | 1.50   | 0.73  |
| Er    | 0.60  | 2.21  | 5.02   | 1.72  | 1.61  | 0.99  | 0.90  | 1.73  | 5.19   | 5.06   | 2.50  |
| Tm    | 0.09  | 0.36  | 0.75   | 0.25  | 0.21  | 0.16  | 0.14  | 0.27  | 0.83   | 0.74   | 0.38  |
| Yb    | 0.63  | 2.60  | 5.34   | 1.79  | 1.72  | 1.04  | 1.10  | 1.95  | 6.30   | 5.67   | 2.81  |
| Lu    | 0.13  | 0.53  | 1.03   | 0.33  | 0.30  | 0.23  | 0.21  | 0.35  | 1.15   | 1.02   | 0.53  |
| Ce*   | 0.30  | 0.20  | 0.20   | 0.18  | 0.17  | 0.15  | 0.15  | 0.13  | 0.10   | 0.12   | 0.17  |
| REE+Y | 29.47 | 89.95 | 198.18 | 85.71 | 79.96 | 51.41 | 44.98 | 75.91 | 164.73 | 164.78 | 98.51 |

47  
48  
49  
50  
51  
52  
53

Ce anomaly was calculated as  $Ce^* = 2Ce/(La + Pr)$  for PAAS (Post-Archean Australian Shale)-normalized values (McLennan, 1989).

| Spot    | Data for Tera-Wasserburg Plots   |        |                                   |        | Dates (for age)                   |             |                                  |             |                                  |             | % Conc* |
|---------|----------------------------------|--------|-----------------------------------|--------|-----------------------------------|-------------|----------------------------------|-------------|----------------------------------|-------------|---------|
|         | $^{238}\text{U}/^{206}\text{Pb}$ | 2s     | $^{207}\text{Pb}/^{206}\text{Pb}$ | 2s     | $^{207}\text{Pb}/^{206}\text{Pb}$ | 2s<br>(abs) | $^{206}\text{Pb}/^{238}\text{U}$ | 2s<br>(abs) | $^{207}\text{Pb}/^{235}\text{U}$ | 2s<br>(abs) |         |
| Bio-3_1 | 8.5648                           | 0.2509 | 0.7393                            | 0.0084 | 4808                              | 16          | 712                              | 20          | 2596                             | 29          | 27.4    |
|         | 8.9275                           | 0.1869 | 0.7413                            | 0.0075 | 4812                              | 15          | 684                              | 14          | 2560                             | 22          | 26.7    |
|         | 7.5224                           | 0.1272 | 0.7458                            | 0.0084 | 4821                              | 16          | 805                              | 13          | 2727                             | 19          | 29.5    |
|         | 7.1937                           | 0.1826 | 0.7628                            | 0.0076 | 4853                              | 14          | 839                              | 20          | 2790                             | 26          | 30.1    |
|         | 7.1512                           | 0.1264 | 0.7592                            | 0.0079 | 4846                              | 15          | 844                              | 14          | 2792                             | 20          | 30.2    |
|         | 6.9994                           | 0.1246 | 0.7567                            | 0.0071 | 4842                              | 13          | 861                              | 14          | 2809                             | 19          | 30.7    |
|         | 7.6195                           | 0.1754 | 0.7516                            | 0.0069 | 4832                              | 13          | 795                              | 17          | 2722                             | 23          | 29.2    |
|         | 7.6584                           | 0.1400 | 0.7633                            | 0.0080 | 4854                              | 15          | 791                              | 14          | 2732                             | 20          | 29.0    |
|         | 7.1216                           | 0.2009 | 0.7682                            | 0.0074 | 4863                              | 14          | 847                              | 22          | 2807                             | 28          | 30.2    |
|         | 7.0728                           | 0.1497 | 0.7604                            | 0.0080 | 4849                              | 15          | 853                              | 17          | 2804                             | 23          | 30.4    |
|         | 8.7640                           | 0.1857 | 0.7533                            | 0.0083 | 4835                              | 16          | 697                              | 14          | 2592                             | 22          | 26.9    |
|         | 6.9065                           | 0.1910 | 0.7691                            | 0.0072 | 4865                              | 13          | 872                              | 23          | 2837                             | 28          | 30.7    |
|         | 7.7563                           | 0.1520 | 0.7628                            | 0.0081 | 4853                              | 15          | 782                              | 14          | 2719                             | 21          | 28.7    |
|         | 8.8629                           | 0.1543 | 0.7505                            | 0.0072 | 4830                              | 14          | 689                              | 11          | 2578                             | 19          | 26.7    |
|         | 8.1174                           | 0.1621 | 0.7472                            | 0.0086 | 4824                              | 17          | 749                              | 14          | 2657                             | 22          | 28.2    |
|         | 8.0634                           | 0.1642 | 0.7514                            | 0.0074 | 4832                              | 14          | 754                              | 15          | 2668                             | 21          | 28.2    |
|         | 9.7090                           | 0.1939 | 0.7377                            | 0.0081 | 4805                              | 16          | 632                              | 12          | 2477                             | 21          | 25.5    |
|         | 10.4760                          | 0.2050 | 0.7250                            | 0.0071 | 4780                              | 14          | 588                              | 11          | 2391                             | 20          | 24.6    |
|         | 10.6576                          | 0.3407 | 0.7173                            | 0.0084 | 4765                              | 17          | 578                              | 18          | 2366                             | 31          | 24.4    |
|         | 12.5039                          | 0.2558 | 0.7141                            | 0.0081 | 4759                              | 16          | 496                              | 10          | 2216                             | 21          | 22.4    |
| 11.8753 | 0.3395                           | 0.7042 | 0.0077                            | 4739   | 16                                | 521         | 14                               | 2250        | 28                               | 23.2        |         |
| 12.0616 | 0.3752                           | 0.7144 | 0.0075                            | 4759   | 15                                | 514         | 15                               | 2249        | 30                               | 22.8        |         |
| 11.1746 | 0.2270                           | 0.7175 | 0.0082                            | 4766   | 16                                | 553         | 11                               | 2323        | 21                               | 23.8        |         |
| 11.7268 | 0.2336                           | 0.7205 | 0.0082                            | 4772   | 16                                | 528         | 10                               | 2283        | 21                               | 23.1        |         |
| 10.3878 | 0.2445                           | 0.7289 | 0.0079                            | 4788   | 16                                | 593         | 13                               | 2404        | 24                               | 24.6        |         |

|         |         |        |        |        |      |     |      |      |      |      |      |
|---------|---------|--------|--------|--------|------|-----|------|------|------|------|------|
| Bio-5_1 | 16.9959 | 0.8494 | 0.6457 | 0.0112 | 4614 | 25  | 369  | 18   | 1859 | 45   | 19.8 |
|         | 17.7448 | 0.8893 | 0.6414 | 0.0119 | 4604 | 27  | 353  | 17   | 1816 | 45   | 19.5 |
|         | 18.3999 | 0.8659 | 0.6387 | 0.0116 | 4598 | 26  | 341  | 16   | 1782 | 42   | 19.1 |
|         | 18.7486 | 0.8566 | 0.6410 | 0.0115 | 4603 | 26  | 335  | 15   | 1769 | 41   | 18.9 |
|         | 18.7900 | 0.7717 | 0.6426 | 0.0114 | 4607 | 26  | 334  | 13   | 1770 | 38   | 18.9 |
|         | 17.8558 | 0.8597 | 0.6425 | 0.0114 | 4607 | 26  | 351  | 17   | 1812 | 43   | 19.4 |
|         | 17.2987 | 0.7979 | 0.6432 | 0.0115 | 4608 | 26  | 362  | 16   | 1840 | 42   | 19.7 |
|         | 15.1945 | 0.6751 | 0.6706 | 0.0117 | 4668 | 25  | 411  | 18   | 1988 | 42   | 20.7 |
|         | 19.4508 | 0.8690 | 0.6322 | 0.0109 | 4583 | 25  | 323  | 14   | 1727 | 40   | 18.7 |
|         | 17.1703 | 1.0681 | 0.6423 | 0.0118 | 4606 | 27  | 365  | 22   | 1845 | 55   | 19.8 |
|         | 18.0779 | 0.8702 | 0.6357 | 0.0111 | 4591 | 25  | 347  | 16   | 1793 | 43   | 19.4 |
|         | 17.7657 | 1.0105 | 0.6457 | 0.0109 | 4614 | 24  | 353  | 20   | 1821 | 50   | 19.4 |
|         | 20.2420 | 0.8950 | 0.6246 | 0.0125 | 4566 | 29  | 311  | 13   | 1684 | 40   | 18.5 |
|         | 20.1438 | 0.8677 | 0.6377 | 0.0124 | 4596 | 28  | 312  | 13   | 1705 | 39   | 18.3 |
|         | 18.0105 | 0.8020 | 0.6482 | 0.0123 | 4619 | 27  | 348  | 15   | 1813 | 41   | 19.2 |
|         | 15.0829 | 0.4616 | 0.6829 | 0.0103 | 4695 | 22  | 414  | 12   | 2010 | 30   | 20.6 |
|         | 14.0230 | 0.5613 | 0.6850 | 0.0108 | 4699 | 23  | 444  | 17   | 2077 | 38   | 21.4 |
|         | 16.4149 | 0.6880 | 0.6576 | 0.0123 | 4640 | 27  | 381  | 16   | 1904 | 40   | 20.0 |
|         | 15.6704 | 0.6794 | 0.6789 | 0.0114 | 4686 | 24  | 399  | 17   | 1972 | 40   | 20.2 |
|         | 15.8910 | 0.5075 | 0.6714 | 0.0106 | 4670 | 23  | 393  | 12   | 1950 | 31   | 20.2 |
|         | 15.0317 | 0.5307 | 0.6806 | 0.0109 | 4690 | 23  | 415  | 14   | 2010 | 34   | 20.7 |
|         | 15.6522 | 0.4550 | 0.6746 | 0.0110 | 4677 | 24  | 399  | 11   | 1967 | 29   | 20.3 |
|         | 18.3540 | 0.7526 | 0.6478 | 0.0112 | 4618 | 25  | 342  | 14   | 1796 | 38   | 19.0 |
| 17.3813 | 0.7267  | 0.6617 | 0.0110 | 4649   | 24   | 361 | 15   | 1860 | 38   | 19.4 |      |
| 17.2802 | 0.5916  | 0.6630 | 0.0110 | 4652   | 24   | 363 | 12   | 1867 | 33   | 19.4 |      |
|         | 5.7785  | 0.1150 | 0.7856 | 0.0112 | 4895 | 20  | 1029 | 19   | 3028 | 24   | 34.0 |
|         | 5.4113  | 0.1198 | 0.7765 | 0.0118 | 4879 | 22  | 1093 | 22   | 3081 | 26   | 35.5 |
|         | 5.2371  | 0.1021 | 0.7843 | 0.0109 | 4893 | 20  | 1127 | 20   | 3122 | 23   | 36.1 |
|         | 3.8968  | 0.1366 | 0.7998 | 0.0120 | 4921 | 21  | 1473 | 46   | 3429 | 37   | 42.9 |
|         | 5.4320  | 0.1247 | 0.7924 | 0.0112 | 4908 | 20  | 1089 | 23   | 3096 | 26   | 35.2 |
|         | 5.4105  | 0.0999 | 0.7903 | 0.0122 | 4904 | 22  | 1093 | 19   | 3098 | 23   | 35.3 |

|         |        |        |        |        |      |      |      |      |      |      |      |
|---------|--------|--------|--------|--------|------|------|------|------|------|------|------|
| Bio-6_1 | 6.0526 | 0.1177 | 0.7758 | 0.0109 | 4877 | 20   | 986  | 18   | 2972 | 23   | 33.2 |
|         | 4.6399 | 0.1403 | 0.7839 | 0.0140 | 4892 | 26   | 1258 | 35   | 3239 | 34   | 38.8 |
|         | 4.9901 | 0.1111 | 0.7807 | 0.0121 | 4886 | 22   | 1178 | 24   | 3164 | 26   | 37.2 |
|         | 5.3343 | 0.1094 | 0.7869 | 0.0116 | 4898 | 21   | 1108 | 21   | 3107 | 24   | 35.6 |
|         | 4.9587 | 0.0947 | 0.7965 | 0.0107 | 4915 | 19   | 1184 | 21   | 3190 | 23   | 37.1 |
|         | 4.6872 | 0.0973 | 0.7851 | 0.0110 | 4894 | 20   | 1247 | 24   | 3231 | 24   | 38.6 |
|         | 4.2851 | 0.1002 | 0.7942 | 0.0127 | 4911 | 23   | 1352 | 29   | 3329 | 28   | 40.6 |
|         | 4.2773 | 0.0761 | 0.8020 | 0.0113 | 4925 | 20   | 1354 | 22   | 3341 | 22   | 40.5 |
|         | 3.5762 | 0.0673 | 0.8135 | 0.0112 | 4945 | 20   | 1590 | 27   | 3530 | 23   | 45.0 |
|         | 3.6136 | 0.0703 | 0.8048 | 0.0116 | 4930 | 21   | 1575 | 27   | 3509 | 24   | 44.9 |
|         | 4.2204 | 0.0855 | 0.8003 | 0.0114 | 4922 | 20   | 1371 | 25   | 3352 | 24   | 40.9 |
|         | 3.6055 | 0.0754 | 0.8099 | 0.0111 | 4939 | 20   | 1578 | 29   | 3518 | 25   | 44.9 |
|         | 5.7184 | 0.1079 | 0.7853 | 0.0102 | 4895 | 19   | 1039 | 18   | 3038 | 22   | 34.2 |
|         | 6.3353 | 0.1055 | 0.7756 | 0.0103 | 4877 | 19   | 945  | 15   | 2928 | 20   | 32.3 |
|         | 6.1624 | 0.1063 | 0.7907 | 0.0100 | 4904 | 18   | 969  | 16   | 2973 | 21   | 32.6 |
|         | 6.1097 | 0.1308 | 0.7859 | 0.0115 | 4896 | 21   | 977  | 19   | 2975 | 25   | 32.8 |
|         | 4.5739 | 0.0853 | 0.8058 | 0.0123 | 4931 | 22   | 1275 | 22   | 3280 | 24   | 38.9 |
|         | 5.5595 | 0.1015 | 0.7884 | 0.0095 | 4900 | 17   | 1066 | 18   | 3069 | 21   | 34.7 |
|         | 5.0948 | 0.0987 | 0.7949 | 0.0109 | 4912 | 20   | 1155 | 21   | 3162 | 23   | 36.5 |
| 2.8308  | 0.0553 | 0.8162 | 0.0113 | 4950   | 20   | 1950 | 33   | 3764 | 24   | 51.8 |      |
| Bio-7_1 | 6.3104 | 0.4323 | 0.7741 | 0.0339 | 4874 | 63   | 948  | 60   | 2930 | 78   | 32.4 |
|         | 6.7705 | 0.4138 | 0.7904 | 0.0352 | 4904 | 64   | 888  | 51   | 2882 | 72   | 30.8 |
|         | 6.5549 | 0.4915 | 0.7894 | 0.0312 | 4902 | 56   | 915  | 64   | 2912 | 81   | 31.4 |
|         | 6.0100 | 0.5697 | 0.7872 | 0.0330 | 4898 | 60   | 992  | 87   | 2993 | 100  | 33.2 |
|         | 7.7084 | 0.5135 | 0.7965 | 0.0325 | 4915 | 58   | 786  | 49   | 2766 | 74   | 28.4 |
|         | 6.7057 | 0.4660 | 0.7839 | 0.0302 | 4892 | 55   | 896  | 58   | 2883 | 76   | 31.1 |
|         | 7.4277 | 0.4393 | 0.7734 | 0.0309 | 4873 | 57   | 814  | 45   | 2773 | 68   | 29.4 |
|         | 7.0911 | 0.4821 | 0.7772 | 0.0328 | 4880 | 60   | 850  | 54   | 2822 | 76   | 30.1 |
|         | 7.1554 | 0.3938 | 0.7749 | 0.0308 | 4876 | 57   | 843  | 44   | 2811 | 65   | 30.0 |
|         | 6.9219 | 0.4532 | 0.7674 | 0.0273 | 4862 | 51   | 870  | 53   | 2833 | 71   | 30.7 |
|         | 6.3836 | 0.4356 | 0.7569 | 0.0309 | 4842 | 58   | 938  | 60   | 2897 | 76   | 32.4 |

|         |         |        |        |        |      |     |      |      |      |      |      |
|---------|---------|--------|--------|--------|------|-----|------|------|------|------|------|
|         | 6.9461  | 0.4252 | 0.7604 | 0.0295 | 4849 | 55  | 867  | 50   | 2821 | 69   | 30.7 |
|         | 6.3176  | 0.6181 | 0.7681 | 0.0307 | 4863 | 57  | 947  | 86   | 2921 | 101  | 32.4 |
|         | 5.7526  | 0.5394 | 0.8036 | 0.0322 | 4928 | 57  | 1033 | 90   | 3055 | 98   | 33.8 |
|         | 6.2789  | 0.4982 | 0.7802 | 0.0308 | 4885 | 56  | 953  | 70   | 2942 | 85   | 32.4 |
|         | 6.8432  | 0.4021 | 0.8120 | 0.0317 | 4942 | 56  | 879  | 48   | 2898 | 68   | 30.3 |
|         | 6.5846  | 0.3973 | 0.8140 | 0.0306 | 4946 | 54  | 911  | 51   | 2937 | 68   | 31.0 |
|         | 6.5380  | 0.3686 | 0.7764 | 0.0285 | 4878 | 52  | 918  | 48   | 2898 | 64   | 31.7 |
|         | 7.1013  | 0.3894 | 0.7856 | 0.0323 | 4895 | 59  | 849  | 44   | 2831 | 65   | 30.0 |
|         | 6.8554  | 0.3425 | 0.7581 | 0.0261 | 4844 | 49  | 878  | 41   | 2830 | 58   | 31.0 |
|         | 6.5172  | 0.3451 | 0.7721 | 0.0267 | 4871 | 49  | 920  | 45   | 2896 | 61   | 31.8 |
|         | 7.0107  | 0.4052 | 0.7349 | 0.0277 | 4800 | 54  | 860  | 47   | 2780 | 66   | 30.9 |
|         | 6.9893  | 0.3953 | 0.7820 | 0.0306 | 4889 | 56  | 862  | 46   | 2842 | 66   | 30.3 |
|         | 6.5254  | 0.4218 | 0.7769 | 0.0281 | 4879 | 52  | 919  | 55   | 2901 | 71   | 31.7 |
|         | 6.9255  | 0.4057 | 0.7743 | 0.0323 | 4875 | 60  | 870  | 48   | 2841 | 69   | 30.6 |
| Slv-7_1 | 13.0784 | 0.5150 | 0.7178 | 0.0190 | 4766 | 38  | 475  | 18   | 2181 | 43   | 21.8 |
|         | 13.3250 | 0.5299 | 0.6967 | 0.0195 | 4723 | 40  | 467  | 18   | 2137 | 43   | 21.8 |
|         | 13.1324 | 0.5089 | 0.7296 | 0.0210 | 4790 | 41  | 473  | 18   | 2192 | 43   | 21.6 |
|         | 13.2008 | 0.5368 | 0.7185 | 0.0196 | 4768 | 39  | 471  | 19   | 2173 | 44   | 21.7 |
|         | 13.3795 | 0.6450 | 0.6956 | 0.0199 | 4721 | 41  | 465  | 22   | 2132 | 50   | 21.8 |
|         | 12.5214 | 0.9532 | 0.7008 | 0.0189 | 4732 | 39  | 495  | 36   | 2198 | 73   | 22.5 |
|         | 13.2404 | 0.6261 | 0.7124 | 0.0198 | 4755 | 40  | 469  | 21   | 2163 | 49   | 21.7 |
|         | 11.1874 | 0.3859 | 0.7391 | 0.0190 | 4808 | 37  | 552  | 18   | 2349 | 39   | 23.5 |
|         | 13.4335 | 0.4936 | 0.7053 | 0.0198 | 4741 | 40  | 463  | 16   | 2141 | 41   | 21.6 |
|         | 13.5288 | 0.6582 | 0.6998 | 0.0197 | 4730 | 41  | 460  | 22   | 2128 | 50   | 21.6 |
|         | 9.9861  | 0.3918 | 0.7289 | 0.0174 | 4788 | 34  | 615  | 23   | 2440 | 42   | 25.2 |
|         | 14.1395 | 0.5596 | 0.7075 | 0.0204 | 4745 | 41  | 441  | 17   | 2098 | 43   | 21.0 |
|         | 13.4764 | 0.6011 | 0.6995 | 0.0209 | 4729 | 43  | 461  | 20   | 2131 | 48   | 21.7 |
|         | 13.3033 | 0.6555 | 0.7067 | 0.0185 | 4744 | 38  | 467  | 22   | 2151 | 50   | 21.7 |
|         | 13.5586 | 0.7017 | 0.6981 | 0.0191 | 4726 | 39  | 459  | 23   | 2124 | 52   | 21.6 |
|         | 13.7848 | 0.5486 | 0.7179 | 0.0196 | 4766 | 39  | 452  | 17   | 2134 | 43   | 21.2 |
| 12.7345 | 0.6914  | 0.7090 | 0.0184 | 4748   | 37   | 487 | 26   | 2194 | 54   | 22.2 |      |

|          |         |        |        |        |      |     |     |      |      |      |      |
|----------|---------|--------|--------|--------|------|-----|-----|------|------|------|------|
|          | 13.5116 | 0.5165 | 0.7281 | 0.0205 | 4787 | 40  | 460 | 17   | 2164 | 43   | 21.3 |
|          | 13.7990 | 0.6446 | 0.7180 | 0.0206 | 4767 | 41  | 451 | 20   | 2133 | 49   | 21.1 |
|          | 13.9087 | 0.5991 | 0.6965 | 0.0199 | 4723 | 41  | 448 | 19   | 2099 | 46   | 21.3 |
|          | 13.6015 | 0.5964 | 0.7108 | 0.0204 | 4752 | 41  | 457 | 19   | 2137 | 47   | 21.4 |
|          | 13.5179 | 0.5504 | 0.7148 | 0.0204 | 4760 | 41  | 460 | 18   | 2147 | 44   | 21.4 |
|          | 7.3650  | 0.2419 | 0.7671 | 0.0164 | 4861 | 31  | 821 | 25   | 2773 | 37   | 29.6 |
|          | 14.2832 | 0.4943 | 0.7152 | 0.0203 | 4761 | 41  | 436 | 15   | 2099 | 40   | 20.8 |
|          | 13.8992 | 0.6410 | 0.7048 | 0.0200 | 4740 | 41  | 448 | 20   | 2110 | 48   | 21.2 |
| Slv-12_1 | 15.3015 | 1.2177 | 0.6854 | 0.0230 | 4700 | 48  | 408 | 32   | 2001 | 76   | 20.4 |
|          | 14.8416 | 1.1703 | 0.7098 | 0.0225 | 4750 | 46  | 420 | 32   | 2058 | 75   | 20.4 |
|          | 16.8700 | 1.2408 | 0.7054 | 0.0243 | 4741 | 50  | 371 | 27   | 1941 | 70   | 19.1 |
|          | 15.3566 | 1.3466 | 0.7066 | 0.0246 | 4744 | 50  | 407 | 35   | 2024 | 83   | 20.1 |
|          | 15.7374 | 1.3229 | 0.6912 | 0.0248 | 4712 | 52  | 397 | 32   | 1984 | 80   | 20.0 |
|          | 16.1846 | 1.1113 | 0.7133 | 0.0243 | 4757 | 49  | 387 | 26   | 1987 | 67   | 19.5 |
|          | 16.4521 | 1.1380 | 0.6954 | 0.0236 | 4721 | 49  | 380 | 26   | 1950 | 67   | 19.5 |
|          | 16.8585 | 1.0987 | 0.6911 | 0.0240 | 4712 | 50  | 372 | 24   | 1924 | 64   | 19.3 |
|          | 15.8270 | 1.1562 | 0.7003 | 0.0251 | 4731 | 52  | 395 | 28   | 1990 | 71   | 19.8 |
|          | 15.4631 | 1.2781 | 0.6873 | 0.0233 | 4704 | 49  | 404 | 32   | 1994 | 78   | 20.3 |
|          | 15.8816 | 1.2122 | 0.7302 | 0.0260 | 4791 | 51  | 394 | 29   | 2024 | 74   | 19.5 |
|          | 16.6338 | 1.0788 | 0.7071 | 0.0229 | 4745 | 47  | 376 | 24   | 1955 | 63   | 19.2 |
|          | 15.9806 | 1.2697 | 0.7024 | 0.0249 | 4735 | 51  | 391 | 30   | 1984 | 76   | 19.7 |
|          | 16.4454 | 1.3372 | 0.7000 | 0.0253 | 4730 | 52  | 381 | 30   | 1956 | 77   | 19.4 |
|          | 14.0619 | 1.2138 | 0.7079 | 0.0236 | 4746 | 48  | 443 | 37   | 2104 | 82   | 21.1 |
|          | 15.8782 | 1.1156 | 0.7177 | 0.0211 | 4766 | 42  | 394 | 27   | 2009 | 67   | 19.6 |
|          | 16.1313 | 1.1808 | 0.7144 | 0.0234 | 4759 | 47  | 388 | 28   | 1991 | 70   | 19.5 |
|          | 16.3171 | 1.2310 | 0.6994 | 0.0245 | 4729 | 50  | 383 | 28   | 1962 | 72   | 19.5 |
|          | 16.0922 | 1.2169 | 0.7129 | 0.0247 | 4756 | 50  | 389 | 29   | 1991 | 73   | 19.5 |
|          | 15.3334 | 1.3019 | 0.6967 | 0.0229 | 4723 | 47  | 407 | 34   | 2013 | 80   | 20.2 |
| 15.6784  | 1.1175  | 0.6904 | 0.0213 | 4710   | 44   | 399 | 28  | 1986 | 68   | 20.1 |      |
| 15.6806  | 1.0278  | 0.7042 | 0.0230 | 4739   | 47   | 399 | 25  | 2003 | 64   | 19.9 |      |
| 17.7873  | 0.9489  | 0.6944 | 0.0238 | 4719   | 49   | 353 | 18  | 1882 | 54   | 18.7 |      |

|          |         |        |        |        |      |     |      |      |      |      |      |
|----------|---------|--------|--------|--------|------|-----|------|------|------|------|------|
|          | 17.4138 | 1.1140 | 0.7235 | 0.0259 | 4778 | 51  | 360  | 22   | 1935 | 63   | 18.6 |
|          | 16.6776 | 1.1333 | 0.6997 | 0.0214 | 4730 | 44  | 375  | 25   | 1944 | 65   | 19.3 |
| Slv-15_1 | 12.0329 | 1.7474 | 0.7606 | 0.0311 | 4849 | 58  | 515  | 72   | 2308 | 137  | 22.3 |
|          | 12.7599 | 2.0401 | 0.7445 | 0.0322 | 4819 | 62  | 486  | 75   | 2236 | 150  | 21.8 |
|          | 17.3301 | 0.9427 | 0.7231 | 0.0313 | 4777 | 62  | 362  | 19   | 1939 | 60   | 18.6 |
|          | 10.4981 | 1.8854 | 0.7501 | 0.0299 | 4829 | 57  | 587  | 101  | 2421 | 170  | 24.2 |
|          | 9.6772  | 1.8243 | 0.7364 | 0.0263 | 4803 | 51  | 634  | 114  | 2479 | 178  | 25.6 |
|          | 9.0392  | 1.7874 | 0.7361 | 0.0285 | 4802 | 55  | 676  | 127  | 2542 | 188  | 26.6 |
|          | 11.6913 | 1.9668 | 0.7365 | 0.0297 | 4803 | 58  | 529  | 85   | 2305 | 158  | 23.0 |
|          | 11.0995 | 1.8168 | 0.7267 | 0.0301 | 4784 | 59  | 556  | 87   | 2340 | 154  | 23.8 |
|          | 10.0187 | 1.7951 | 0.7543 | 0.0304 | 4837 | 58  | 613  | 105  | 2469 | 170  | 24.8 |
|          | 9.2781  | 1.8180 | 0.7339 | 0.0289 | 4798 | 56  | 660  | 123  | 2515 | 186  | 26.2 |
|          | 10.8433 | 1.8635 | 0.7371 | 0.0325 | 4804 | 63  | 569  | 94   | 2375 | 163  | 23.9 |
|          | 6.4614  | 1.0718 | 0.7620 | 0.0246 | 4852 | 46  | 928  | 143  | 2892 | 162  | 32.1 |
|          | 10.6567 | 1.8083 | 0.7236 | 0.0324 | 4778 | 64  | 578  | 94   | 2374 | 161  | 24.4 |
|          | 10.1423 | 1.9450 | 0.7149 | 0.0276 | 4760 | 55  | 606  | 111  | 2408 | 180  | 25.2 |
|          | 10.7984 | 1.8456 | 0.7132 | 0.0275 | 4757 | 55  | 571  | 93   | 2348 | 160  | 24.3 |
|          | 12.8390 | 1.9949 | 0.7052 | 0.0276 | 4741 | 56  | 484  | 72   | 2181 | 144  | 22.2 |
|          | 8.8397  | 1.8441 | 0.7215 | 0.0286 | 4774 | 57  | 691  | 137  | 2544 | 198  | 27.2 |
|          | 6.0484  | 1.3881 | 0.7917 | 0.0263 | 4906 | 47  | 986  | 210  | 2992 | 223  | 33.0 |
|          | 12.7506 | 1.9001 | 0.7217 | 0.0296 | 4774 | 59  | 487  | 70   | 2208 | 139  | 22.0 |
|          | 9.4199  | 1.7789 | 0.7132 | 0.0251 | 4757 | 51  | 650  | 117  | 2474 | 178  | 26.3 |
|          | 5.4674  | 0.7665 | 0.7853 | 0.0225 | 4895 | 41  | 1083 | 140  | 3081 | 138  | 35.1 |
|          | 11.6005 | 1.9677 | 0.7366 | 0.0307 | 4803 | 60  | 533  | 87   | 2312 | 159  | 23.0 |
|          | 11.6627 | 1.7223 | 0.7073 | 0.0280 | 4745 | 57  | 530  | 75   | 2271 | 139  | 23.4 |
|          | 9.1066  | 1.7457 | 0.7150 | 0.0267 | 4761 | 54  | 672  | 122  | 2508 | 182  | 26.8 |
| 8.4956   | 1.7155  | 0.7583 | 0.0323 | 4845   | 61   | 717 | 137  | 2628 | 194  | 27.3 |      |
| 10.2291  | 1.8843  | 0.7511 | 0.0307 | 4831   | 59   | 601 | 106  | 2446 | 174  | 24.6 |      |
|          | 9.0877  | 0.1566 | 0.2221 | 0.0070 | 2995 | 51  | 673  | 11   | 1497 | 28   | 45.0 |
|          | 9.2255  | 0.1405 | 0.2221 | 0.0049 | 2995 | 36  | 663  | 10   | 1485 | 21   | 44.7 |
|          | 10.0012 | 0.1526 | 0.1588 | 0.0036 | 2442 | 38  | 614  | 9    | 1177 | 19   | 52.2 |

|                |         |        |        |        |      |      |     |      |      |      |      |
|----------------|---------|--------|--------|--------|------|------|-----|------|------|------|------|
| MMS<br>apatite | 8.4835  | 0.1558 | 0.2805 | 0.0071 | 3365 | 40   | 718 | 13   | 1741 | 26   | 41.2 |
|                | 9.8324  | 0.1355 | 0.1796 | 0.0039 | 2648 | 36   | 624 | 8    | 1277 | 19   | 48.9 |
|                | 9.5013  | 0.1579 | 0.2258 | 0.0060 | 3022 | 43   | 645 | 10   | 1475 | 24   | 43.7 |
|                | 9.0594  | 0.1493 | 0.2441 | 0.0061 | 3146 | 40   | 675 | 11   | 1574 | 24   | 42.9 |
|                | 9.9208  | 0.1739 | 0.1952 | 0.0055 | 2786 | 46   | 619 | 10   | 1332 | 25   | 46.5 |
|                | 9.6750  | 0.1736 | 0.2181 | 0.0068 | 2966 | 50   | 634 | 11   | 1434 | 28   | 44.2 |
|                | 9.9301  | 0.2567 | 0.2035 | 0.0097 | 2854 | 78   | 619 | 15   | 1362 | 41   | 45.4 |
|                | 10.6648 | 0.2249 | 0.1425 | 0.0067 | 2257 | 81   | 578 | 12   | 1060 | 34   | 54.5 |
|                | 10.4872 | 0.2161 | 0.1270 | 0.0063 | 2056 | 88   | 587 | 12   | 997  | 34   | 58.9 |
|                | 9.7463  | 0.1868 | 0.2135 | 0.0069 | 2932 | 52   | 630 | 12   | 1412 | 29   | 44.6 |
|                | 10.2698 | 0.1590 | 0.1973 | 0.0050 | 2803 | 41   | 599 | 9    | 1314 | 22   | 45.6 |
|                | 10.0476 | 0.1746 | 0.2041 | 0.0060 | 2859 | 48   | 612 | 10   | 1355 | 26   | 45.1 |
|                | 9.4577  | 0.1680 | 0.2332 | 0.0061 | 3073 | 42   | 648 | 11   | 1504 | 25   | 43.1 |
|                | 9.0606  | 0.1596 | 0.2602 | 0.0071 | 3247 | 43   | 675 | 11   | 1626 | 26   | 41.5 |
|                | 10.4567 | 0.1503 | 0.1497 | 0.0033 | 2342 | 38   | 589 | 8    | 1106 | 18   | 53.2 |
|                | 9.4601  | 0.1422 | 0.2025 | 0.0048 | 2846 | 39   | 648 | 9    | 1395 | 21   | 46.4 |
|                | 9.7716  | 0.1794 | 0.1966 | 0.0056 | 2797 | 47   | 628 | 11   | 1348 | 25   | 46.6 |
|                | 9.9594  | 0.1933 | 0.2099 | 0.0070 | 2904 | 54   | 617 | 11   | 1383 | 29   | 44.6 |
|                | 9.8281  | 0.1878 | 0.2226 | 0.0069 | 2999 | 50   | 625 | 11   | 1438 | 28   | 43.4 |
|                | 9.5940  | 0.1720 | 0.2201 | 0.0061 | 2981 | 45   | 639 | 11   | 1448 | 26   | 44.1 |
|                | 10.2717 | 0.1741 | 0.1829 | 0.0053 | 2679 | 48   | 599 | 10   | 1259 | 24   | 47.6 |
|                | 10.3991 | 0.2029 | 0.1883 | 0.0058 | 2727 | 51   | 592 | 11   | 1271 | 26   | 46.6 |
|                | 9.8348  | 0.1701 | 0.2107 | 0.0065 | 2910 | 50   | 624 | 10   | 1396 | 27   | 44.7 |
| 9.9857         | 0.1991  | 0.1721 | 0.0058 | 2577   | 56   | 615  | 12  | 1235 | 28   | 49.8 |      |
| 8.9984         | 0.1795  | 0.2466 | 0.0074 | 3162   | 48   | 679  | 13  | 1588 | 29   | 42.8 |      |
| 5.7933         | 0.1519  | 0.1561 | 0.0044 | 2413   | 48   | 1027 | 25  | 1574 | 31   | 65.2 |      |
| 4.5912         | 0.0747  | 0.2953 | 0.0056 | 3445   | 29   | 1270 | 19  | 2324 | 23   | 54.7 |      |
| 6.0787         | 0.0824  | 0.1425 | 0.0024 | 2257   | 29   | 982  | 12  | 1465 | 17   | 67.0 |      |
| 5.9538         | 0.0740  | 0.1513 | 0.0019 | 2360   | 21   | 1001 | 12  | 1528 | 14   | 65.5 |      |
| 6.1081         | 0.0727  | 0.1445 | 0.0018 | 2281   | 21   | 977  | 11  | 1472 | 13   | 66.4 |      |

|                          |        |        |        |        |      |    |      |    |      |    |      |
|--------------------------|--------|--------|--------|--------|------|----|------|----|------|----|------|
| Otter<br>Lake<br>apatite | 6.0187 | 0.0703 | 0.1466 | 0.0015 | 2306 | 18 | 991  | 11 | 1494 | 12 | 66.3 |
|                          | 6.0236 | 0.0719 | 0.1425 | 0.0015 | 2257 | 18 | 990  | 11 | 1472 | 12 | 67.3 |
|                          | 5.9227 | 0.0700 | 0.1467 | 0.0016 | 2307 | 19 | 1006 | 11 | 1508 | 13 | 66.7 |
|                          | 5.3793 | 0.0942 | 0.2088 | 0.0040 | 2896 | 31 | 1099 | 18 | 1877 | 22 | 58.6 |
|                          | 5.9458 | 0.1016 | 0.1437 | 0.0029 | 2272 | 35 | 1002 | 16 | 1488 | 21 | 67.3 |
|                          | 5.8675 | 0.1426 | 0.1465 | 0.0038 | 2305 | 45 | 1015 | 23 | 1514 | 28 | 67.0 |
|                          | 5.8221 | 0.1576 | 0.1470 | 0.0052 | 2311 | 61 | 1022 | 26 | 1523 | 35 | 67.1 |
|                          | 5.8634 | 0.1160 | 0.1545 | 0.0047 | 2396 | 52 | 1015 | 19 | 1557 | 29 | 65.2 |
|                          | 5.8685 | 0.0752 | 0.1541 | 0.0019 | 2391 | 21 | 1014 | 12 | 1554 | 14 | 65.3 |
|                          | 5.9917 | 0.1163 | 0.1415 | 0.0038 | 2245 | 46 | 995  | 18 | 1470 | 26 | 67.7 |
|                          | 5.6370 | 0.0751 | 0.1852 | 0.0040 | 2699 | 36 | 1053 | 13 | 1736 | 21 | 60.6 |
|                          | 5.8492 | 0.0803 | 0.1590 | 0.0023 | 2444 | 25 | 1017 | 13 | 1581 | 16 | 64.3 |
|                          | 5.0270 | 0.0832 | 0.2555 | 0.0052 | 3219 | 32 | 1170 | 18 | 2112 | 23 | 55.4 |
|                          | 5.0170 | 0.0958 | 0.2278 | 0.0070 | 3036 | 49 | 1172 | 21 | 2013 | 32 | 58.2 |

56

57 % Conc – Degree of concordance =  $(^{206}\text{Pb}/^{238}\text{U age} * 100) / (^{207}\text{Pb}/^{235}\text{U age})$ .
